# Supplementary material for: AAV-CRISPR-Cas13 eliminates human enterovirus and prevents death of infected mice
Source: PubMed Central journal article supplement — eBioMedicine. 2023 Jun 28;93:104682. doi: 10.1016/j.ebiom.2023.104682 (PMC10363442; doi:10.1016/j.ebiom.2023.104682), 2023-06-28
Supplement: mmc2.pdf [file mmc2.pdf]

**Supplementary Table. Comparison of therapeutic modalities against EV-A71.**

|                                | PMID     | Modality                                          | Viral RNA reduction (%) | Viral plaque reduction | Accessible tissues  | Target specificity <i>in vivo</i>          | Therapeutic window                       |
|--------------------------------|----------|---------------------------------------------------|-------------------------|------------------------|---------------------|--------------------------------------------|------------------------------------------|
| <b>Sim et al., 2005</b>        | 16083932 | siRNA                                             | 77.5 (in vitro)         | ~1 log PFU             | RD cells            | Protein kinase R not activated             | N.A.                                     |
| <b>Tan et al., 2007</b>        | 17712333 | siRNA                                             | 100                     | -                      | Intestinal          | IFN not activated                          | 24hr post EV-A71                         |
| <b>Tan et al., 2018</b>        | 29175128 | Chloroquine                                       | -                       | 2 log PFU/ml           | Muscles             | -                                          | Daily doses over 7 days                  |
| <b>Cao et al., 2011</b>        | 21641277 | Immunoglobulin                                    | -                       | -                      | -                   | -                                          | -                                        |
| <b>Jia et al., 2017</b>        | 28422137 | Immunoglobulin                                    | -                       | -                      | -                   | -                                          | 24hr post EV-A71                         |
| <b>Sun et al., 2016</b>        | 27623347 | Adenoviral IFN                                    | -                       | 1 log PFU/ml           | Muscle              | -                                          | 12hr post EV-A71                         |
| <b>Sun et al., 2020</b>        | 32424333 | Sofosbuvir nucleotide analog                      | -                       | 0.7 log PFU/ml         | Muscle              | -                                          | 5 doses over 4 days                      |
| <b>Gunaseelan et al., 2019</b> | 31666401 | Prunin                                            | -                       | 4 - 5 log PFU/ml       | Muscle              | -                                          | Daily doses over 7 days                  |
| <b>Tan et al., 2021</b>        | 33958691 | Protein inhibition drugs in combination           | -                       | -                      | Muscle              | -                                          | Daily over 6 days                        |
| <b>Fan et al., 2021</b>        | 34555337 | Viral suppressor of RNAi (VSR)-targeting peptides | Approximately 90-99%    | -                      | Muscle, brain, lung | -                                          | 2hr post EV-A71, twice a day over 7 days |
| <b>This study</b>              | -        | AAV-CRISPR-CasRx                                  | 99.9                    | 4 – 5 log PFU/ml       | Muscle, brain       | No off-target in whole human transcriptome | 24hr post EV-A71                         |

“-“, not tested or not shown
